# Supplementary material for: Cord Blood-Derived Macrophage-Lineage Cells Rapidly Stimulate Osteoblastic Maturation in Mesenchymal Stem Cells in a Glycoprotein-130 Dependent Manner
Source: PubMed Central journal article supplement (PMC3772005; doi:10.1371/journal.pone.0073266), 2013-09-12

# Supporting Figure S1

## A Alkaline Phosphatase

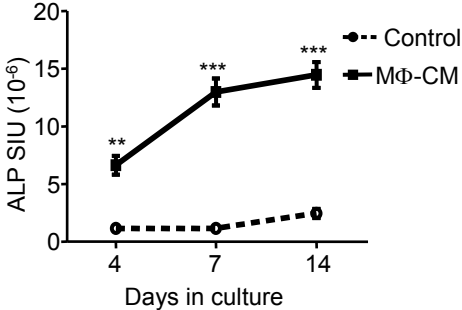

## B Mineralisation

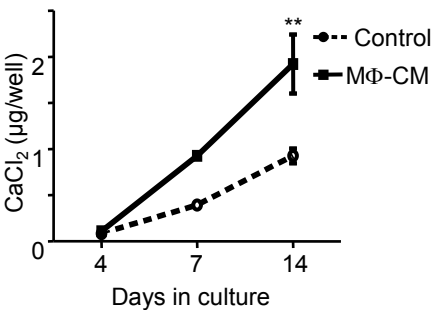

## C

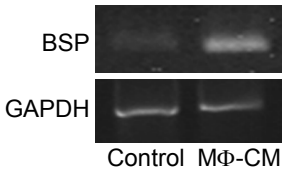

Supplement: pone.0073266.s001.pdf [file pone.0073266.s001.pdf]
