# Supplementary material for: Cord Blood-Derived Macrophage-Lineage Cells Rapidly Stimulate Osteoblastic Maturation in Mesenchymal Stem Cells in a Glycoprotein-130 Dependent Manner
Source: PubMed Central journal article supplement (PMC3772005; doi:10.1371/journal.pone.0073266), 2013-09-12

**Supporting Figure S2**

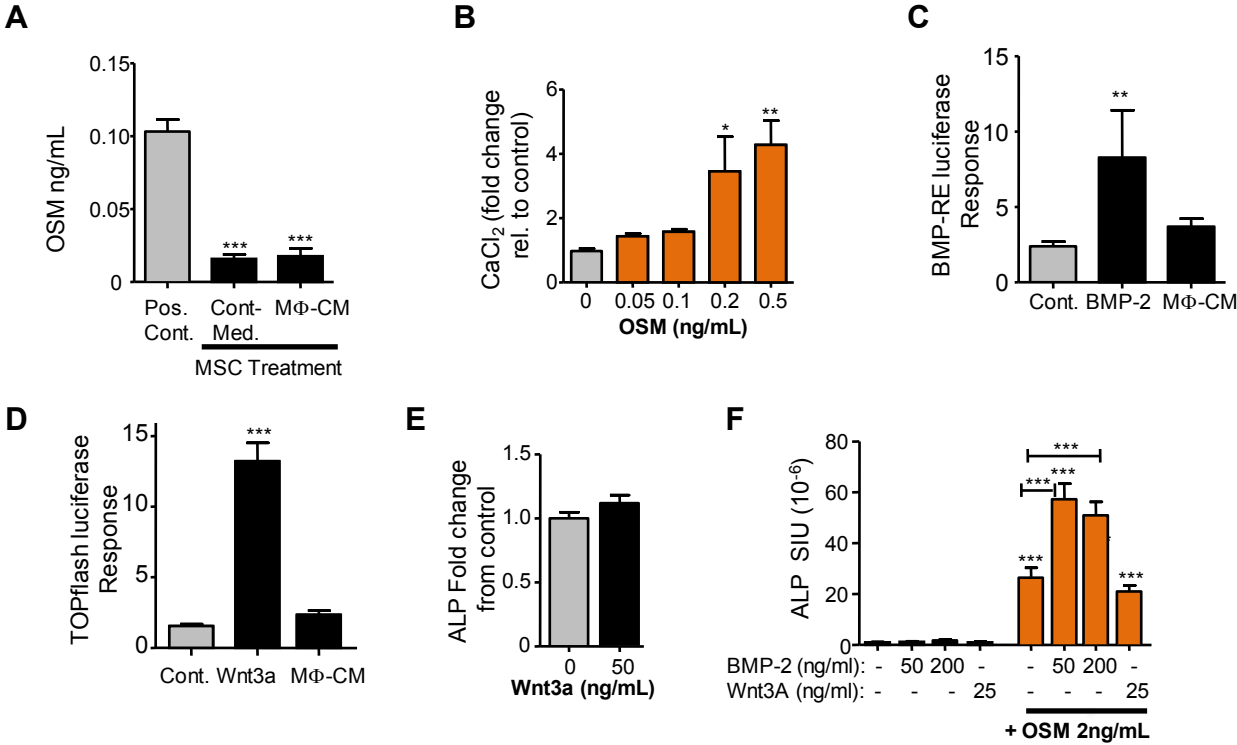

Supplement: pone.0073266.s002.pdf [file pone.0073266.s002.pdf]
